# Supplementary material
Source: publisher figshare collection journal article supplement (https://acs.figshare.com/ndownloader/files/4064077)
Supplement: Supplementary file 1 [file 4064077]

 
data_sv04 
 
_audit_creation_method            SHELXL-97 
_chemical_name_systematic 
; 
 ? 
; 
_chemical_name_common             'CALIXARENE' 
_chemical_melting_point           ? 
_chemical_formula_moiety          'C80 H82 N6 O4, 2(CHCl3)' 
_chemical_formula_sum 
 'C82 H84 Cl6 N6 O4' 
_chemical_formula_weight          1430.25 
 
loop_ 
 _atom_type_symbol 
 _atom_type_description 
 _atom_type_scat_dispersion_real 
 _atom_type_scat_dispersion_imag 
 _atom_type_scat_source 
 'C'  'C'   0.0033   0.0016 
 'International Tables Vol C Tables 4.2.6.8 and 6.1.1.4' 
 'H'  'H'   0.0000   0.0000 
 'International Tables Vol C Tables 4.2.6.8 and 6.1.1.4' 
 'N'  'N'   0.0061   0.0033 
 'International Tables Vol C Tables 4.2.6.8 and 6.1.1.4' 
 'O'  'O'   0.0106   0.0060 
 'International Tables Vol C Tables 4.2.6.8 and 6.1.1.4' 
 'Cl'  'Cl'   0.1484   0.1585 
 'International Tables Vol C Tables 4.2.6.8 and 6.1.1.4' 
 
_symmetry_cell_setting            'triclinic' 
_symmetry_space_group_name_H-M    'P-1' 
 
loop_ 
 _symmetry_equiv_pos_as_xyz 
 'x, y, z' 
 '-x, -y, -z' 
 
_cell_length_a                    12.8268(14) 
_cell_length_b                    16.8384(18) 
_cell_length_c                    19.527(2) 
_cell_angle_alpha                 70.017(6) 
_cell_angle_beta                  73.553(6) 
_cell_angle_gamma                 74.051(6) 
_cell_volume                      3726.5(7) 
_cell_formula_units_Z             2 
_cell_measurement_temperature     160(2) 
_cell_measurement_reflns_used     6339 
_cell_measurement_theta_min       2.27 
_cell_measurement_theta_max       22.86 
 
_exptl_crystal_description        'plate' 
_exptl_crystal_colour             'yellow' 
_exptl_crystal_size_max           0.41 
_exptl_crystal_size_mid           0.12 
_exptl_crystal_size_min           0.05 
_exptl_crystal_density_meas       ? 
_exptl_crystal_density_diffrn     1.275 
_exptl_crystal_density_method     'not measured' 
_exptl_crystal_F_000              1504 
_exptl_absorpt_coefficient_mu     0.285 
_exptl_absorpt_correction_type    'multi-scan' 
_exptl_absorpt_correction_T_min   0.8909 
_exptl_absorpt_correction_T_max   0.9851 
_exptl_absorpt_process_details    'Bruker SADABS' 
 
_exptl_special_details 
; 
 ? 
; 
 
_diffrn_ambient_temperature       160(2) 
_diffrn_radiation_wavelength      0.71073 
_diffrn_radiation_type            MoK\a 
_diffrn_radiation_source          'fine-focus sealed tube' 
_diffrn_radiation_monochromator   graphite 
_diffrn_measurement_device_type   'CCD Area Detector' 
_diffrn_measurement_device        'BRUKER SMART APEX'
_diffrn_measurement_method        'Omega and phi Scan' 
_diffrn_detector_area_resol_mean  ? 
_diffrn_reflns_number             40846 
_diffrn_reflns_av_R_equivalents   0.0661 
_diffrn_reflns_av_sigmaI/netI     0.0942 
_diffrn_reflns_limit_h_min        -15 
_diffrn_reflns_limit_h_max        15 
_diffrn_reflns_limit_k_min        -19 
_diffrn_reflns_limit_k_max        20 
_diffrn_reflns_limit_l_min        -21 
_diffrn_reflns_limit_l_max        23 
_diffrn_reflns_theta_min          1.31 
_diffrn_reflns_theta_max          25.00 
_reflns_number_total              12858 
_reflns_number_gt                 8766 
_reflns_threshold_expression      >2sigma(I) 
 
_computing_data_collection        'SMART (Bruker, 2000)' 
_computing_cell_refinement        'SMART (Bruker, 2000)' 
_computing_data_reduction         'SAINT(Bruker, 2000)' 
_computing_structure_solution     'SHELXS-97 (Sheldrick, 2008)' 
_computing_structure_refinement   'SHELXL-97 (Sheldrick, 2008)'  
_computing_molecular_graphics     'SHELXL-97 (Sheldrick, 2008)'    
_computing_publication_material   'SHELXL-97 (Sheldrick, 2008)'  
 
_refine_special_details 
; 
 Refinement of F^2^ against ALL reflections.  The weighted R-factor wR and 
 goodness of fit S are based on F^2^, conventional R-factors R are based 
 on F, with F set to zero for negative F^2^. The threshold expression of 
 F^2^ > 2sigma(F^2^) is used only for calculating R-factors(gt) etc. and is 
 not relevant to the choice of reflections for refinement.  R-factors based 
 on F^2^ are statistically about twice as large as those based on F, and R- 
 factors based on ALL data will be even larger. 
; 
 
_refine_ls_structure_factor_coef  Fsqd  
_refine_ls_matrix_type            full 
_refine_ls_weighting_scheme       calc  
_refine_ls_weighting_details 
 'calc w=1/[\s^2^(Fo^2^)+(0.0745P)^2^+12.2938P] where P=(Fo^2^+2Fc^2^)/3' 
_atom_sites_solution_primary      direct 
_atom_sites_solution_secondary    difmap 
_atom_sites_solution_hydrogens    geom 
_refine_ls_hydrogen_treatment     constr
_refine_ls_extinction_method      SHELXL 
_refine_ls_extinction_coef        0.0016(4) 
_refine_ls_extinction_expression 
 'Fc^*^=kFc[1+0.001xFc^2^\l^3^/sin(2\q)]^-1/4^' 
_refine_ls_number_reflns          12858 
_refine_ls_number_parameters      898 
_refine_ls_number_restraints      0 
_refine_ls_R_factor_all           0.1480 
_refine_ls_R_factor_gt            0.1034 
_refine_ls_wR_factor_ref          0.2368 
_refine_ls_wR_factor_gt           0.2169 
_refine_ls_goodness_of_fit_ref    1.129 
_refine_ls_restrained_S_all       1.129 
_refine_ls_shift/su_max           0.000 
_refine_ls_shift/su_mean          0.000 
 
loop_ 
 _atom_site_label 
 _atom_site_type_symbol 
 _atom_site_fract_x 
 _atom_site_fract_y 
 _atom_site_fract_z 
 _atom_site_U_iso_or_equiv 
 _atom_site_adp_type 
 _atom_site_occupancy 
 _atom_site_symmetry_multiplicity 
 _atom_site_calc_flag 
 _atom_site_refinement_flags 
 _atom_site_disorder_assembly 
 _atom_site_disorder_group 
O1 O 0.8942(3) 0.7980(2) 0.71303(19) 0.0204(8) Uani 1 1 d . . . 
H1A H 0.8582 0.7783 0.7562 0.031 Uiso 1 1 calc R . . 
O2 O 0.8898(3) 0.6698(2) 0.86394(18) 0.0202(8) Uani 1 1 d . . . 
O3 O 1.1020(3) 0.7133(2) 0.79969(19) 0.0223(8) Uani 1 1 d . . . 
H3A H 1.1034 0.7486 0.7571 0.034 Uiso 1 1 calc R . . 
O4 O 1.0915(3) 0.8766(2) 0.66604(18) 0.0183(8) Uani 1 1 d . . . 
N1 N 0.7938(4) 0.7013(3) 1.0496(2) 0.0228(10) Uani 1 1 d . . . 
N2 N 0.8337(4) 0.7507(3) 1.0719(2) 0.0247(11) Uani 1 1 d . . . 
N3 N 0.9117(4) 0.7836(3) 1.0150(2) 0.0206(10) Uani 1 1 d . . . 
N4 N 0.9973(4) 1.1073(3) 0.6454(2) 0.0255(11) Uani 1 1 d . . . 
N5 N 0.8949(4) 1.1404(3) 0.6750(3) 0.0262(11) Uani 1 1 d . . . 
N6 N 0.8416(4) 1.0740(3) 0.7102(2) 0.0217(10) Uani 1 1 d . . . 
C1 C 0.8509(4) 0.7847(3) 0.6622(3) 0.0154(11) Uani 1 1 d . . . 
C2 C 0.8840(4) 0.8243(3) 0.5858(3) 0.0184(12) Uani 1 1 d . . . 
C3 C 0.8363(4) 0.8114(3) 0.5361(3) 0.0204(12) Uani 1 1 d . . . 
H3 H 0.8597 0.8378 0.4844 0.024 Uiso 1 1 calc R . . 
C4 C 0.7564(4) 0.7620(3) 0.5582(3) 0.0177(12) Uani 1 1 d . . . 
C5 C 0.7261(4) 0.7219(3) 0.6349(3) 0.0187(12) Uani 1 1 d . . . 
H5 H 0.6717 0.6870 0.6517 0.022 Uiso 1 1 calc R . . 
C6 C 0.7728(4) 0.7314(3) 0.6875(3) 0.0162(11) Uani 1 1 d . . . 
C7 C 0.7488(4) 0.6794(3) 0.7681(3) 0.0175(11) Uani 1 1 d . . . 
H7A H 0.6812 0.6561 0.7786 0.021 Uiso 1 1 calc R . . 
H7B H 0.7348 0.7172 0.8004 0.021 Uiso 1 1 calc R . . 
C8 C 0.8459(4) 0.6054(3) 0.7861(3) 0.0152(11) Uani 1 1 d . . . 
C9 C 0.9133(4) 0.6039(3) 0.8310(3) 0.0141(11) Uani 1 1 d . . . 
C10 C 1.0078(4) 0.5395(3) 0.8415(3) 0.0192(12) Uani 1 1 d . . . 
C11 C 1.0321(4) 0.4750(3) 0.8071(3) 0.0218(12) Uani 1 1 d . . . 
H11 H 1.0955 0.4306 0.8148 0.026 Uiso 1 1 calc R . . 
C12 C 0.9670(4) 0.4730(3) 0.7618(3) 0.0215(12) Uani 1 1 d . . . 
C13 C 0.8742(4) 0.5398(3) 0.7523(3) 0.0173(11) Uani 1 1 d . . . 
H13 H 0.8286 0.5402 0.7214 0.021 Uiso 1 1 calc R . . 
C14 C 1.0838(4) 0.5398(4) 0.8886(3) 0.0263(13) Uani 1 1 d . . . 
H14A H 1.0999 0.4815 0.9234 0.032 Uiso 1 1 calc R . . 
H14B H 1.0451 0.5803 0.9188 0.032 Uiso 1 1 calc R . . 
C15 C 1.1929(4) 0.5660(3) 0.8418(3) 0.0175(11) Uani 1 1 d . . . 
C16 C 1.1958(4) 0.6510(3) 0.7985(3) 0.0166(11) Uani 1 1 d . . . 
C17 C 1.2964(4) 0.6729(3) 0.7535(3) 0.0180(11) Uani 1 1 d . . . 
C18 C 1.3910(4) 0.6097(3) 0.7558(3) 0.0193(12) Uani 1 1 d . . . 
H18 H 1.4592 0.6252 0.7263 0.023 Uiso 1 1 calc R . . 
C19 C 1.3924(4) 0.5246(3) 0.7987(3) 0.0193(12) Uani 1 1 d . . . 
C20 C 1.2908(4) 0.5044(3) 0.8407(3) 0.0209(12) Uani 1 1 d . . . 
H20 H 1.2881 0.4466 0.8698 0.025 Uiso 1 1 calc R . . 
C21 C 1.2940(4) 0.7609(3) 0.6960(3) 0.0181(11) Uani 1 1 d . . . 
H21A H 1.2514 0.8066 0.7200 0.022 Uiso 1 1 calc R . . 
H21B H 1.3705 0.7713 0.6743 0.022 Uiso 1 1 calc R . . 
C22 C 1.2404(4) 0.7638(3) 0.6352(3) 0.0165(11) Uani 1 1 d . . . 
C23 C 1.1413(4) 0.8209(3) 0.6218(3) 0.0138(11) Uani 1 1 d . . . 
C24 C 1.0864(4) 0.8185(3) 0.5703(3) 0.0189(12) Uani 1 1 d . . . 
C25 C 1.1345(4) 0.7576(3) 0.5310(3) 0.0221(12) Uani 1 1 d . . . 
H25 H 1.0991 0.7561 0.4949 0.027 Uiso 1 1 calc R . . 
C26 C 1.2324(5) 0.6989(3) 0.5426(3) 0.0227(13) Uani 1 1 d . . . 
C27 C 1.2840(4) 0.7044(3) 0.5947(3) 0.0196(12) Uani 1 1 d . . . 
H27 H 1.3520 0.6657 0.6026 0.023 Uiso 1 1 calc R . . 
C28 C 0.9747(4) 0.8764(3) 0.5588(3) 0.0219(12) Uani 1 1 d . . . 
H28A H 0.9562 0.9198 0.5863 0.026 Uiso 1 1 calc R . . 
H28B H 0.9794 0.9074 0.5052 0.026 Uiso 1 1 calc R . . 
C29 C 0.7047(5) 0.7471(4) 0.5025(3) 0.0289(14) Uani 1 1 d . . . 
C30 C 0.7509(8) 0.6551(6) 0.4978(5) 0.082(3) Uani 1 1 d . . . 
H30A H 0.8319 0.6460 0.4828 0.123 Uiso 1 1 calc R . . 
H30B H 0.7209 0.6457 0.4609 0.123 Uiso 1 1 calc R . . 
H30C H 0.7295 0.6146 0.5466 0.123 Uiso 1 1 calc R . . 
C31 C 0.5793(6) 0.7592(6) 0.5278(4) 0.068(3) Uani 1 1 d . . . 
H31A H 0.5599 0.7083 0.5680 0.102 Uiso 1 1 calc R . . 
H31B H 0.5465 0.7667 0.4858 0.102 Uiso 1 1 calc R . . 
H31C H 0.5507 0.8103 0.5458 0.102 Uiso 1 1 calc R . . 
C32 C 0.7297(9) 0.8089(7) 0.4255(4) 0.100(4) Uani 1 1 d . . . 
H32A H 0.6946 0.8680 0.4272 0.149 Uiso 1 1 calc R . . 
H32B H 0.7006 0.7943 0.3909 0.149 Uiso 1 1 calc R . . 
H32C H 0.8101 0.8045 0.4084 0.149 Uiso 1 1 calc R . . 
C33 C 0.9909(5) 0.4012(4) 0.7245(3) 0.0336(15) Uani 1 1 d . . . 
C34 C 1.1066(7) 0.3449(5) 0.7277(4) 0.070(3) Uani 1 1 d . . . 
H34A H 1.1158 0.2973 0.7070 0.106 Uiso 1 1 calc R . . 
H34B H 1.1151 0.3215 0.7796 0.106 Uiso 1 1 calc R . . 
H34C H 1.1628 0.3797 0.6985 0.106 Uiso 1 1 calc R . . 
C35 C 0.9045(8) 0.3434(5) 0.7652(6) 0.094(4) Uani 1 1 d . . . 
H35A H 0.8299 0.3783 0.7628 0.141 Uiso 1 1 calc R . . 
H35B H 0.9108 0.3173 0.8175 0.141 Uiso 1 1 calc R . . 
H35C H 0.9180 0.2979 0.7414 0.141 Uiso 1 1 calc R . . 
C36 C 0.9849(7) 0.4377(5) 0.6430(4) 0.061(2) Uani 1 1 d . . . 
H36A H 0.9072 0.4585 0.6386 0.091 Uiso 1 1 calc R . . 
H36B H 1.0191 0.3925 0.6179 0.091 Uiso 1 1 calc R . . 
H36C H 1.0247 0.4855 0.6197 0.091 Uiso 1 1 calc R . . 
C37 C 1.5020(5) 0.4578(4) 0.7969(3) 0.0312(14) Uani 1 1 d . . . 
C38 C 1.5453(6) 0.4489(5) 0.7177(4) 0.059(2) Uani 1 1 d . . . 
H38A H 1.4893 0.4321 0.7032 0.089 Uiso 1 1 calc R . . 
H38B H 1.6135 0.4048 0.7162 0.089 Uiso 1 1 calc R . . 
H38C H 1.5611 0.5042 0.6831 0.089 Uiso 1 1 calc R . . 
C39 C 1.5870(5) 0.4898(4) 0.8185(4) 0.0479(18) Uani 1 1 d . . . 
H39A H 1.6056 0.5422 0.7800 0.072 Uiso 1 1 calc R . . 
H39B H 1.6542 0.4451 0.8227 0.072 Uiso 1 1 calc R . . 
H39C H 1.5548 0.5026 0.8664 0.072 Uiso 1 1 calc R . . 
C40 C 1.4878(6) 0.3703(4) 0.8525(4) 0.0460(18) Uani 1 1 d . . . 
H40A H 1.4716 0.3748 0.9033 0.069 Uiso 1 1 calc R . . 
H40B H 1.5562 0.3278 0.8446 0.069 Uiso 1 1 calc R . . 
H40C H 1.4263 0.3521 0.8452 0.069 Uiso 1 1 calc R . . 
C41 C 1.2831(6) 0.6281(4) 0.5034(4) 0.0404(17) Uani 1 1 d . . . 
C42 C 1.3973(7) 0.6400(7) 0.4576(6) 0.097(4) Uani 1 1 d . . . 
H42A H 1.4287 0.5953 0.4318 0.145 Uiso 1 1 calc R . . 
H42B H 1.4453 0.6355 0.4905 0.145 Uiso 1 1 calc R . . 
H42C H 1.3920 0.6970 0.4209 0.145 Uiso 1 1 calc R . . 
C43 C 1.2962(8) 0.5400(5) 0.5629(5) 0.075(3) Uani 1 1 d . . . 
H43A H 1.3305 0.4943 0.5385 0.112 Uiso 1 1 calc R . . 
H43B H 1.2231 0.5303 0.5933 0.112 Uiso 1 1 calc R . . 
H43C H 1.3432 0.5395 0.5949 0.112 Uiso 1 1 calc R . . 
C44 C 1.2113(8) 0.6270(6) 0.4545(5) 0.086(3) Uani 1 1 d . . . 
H44A H 1.2050 0.6816 0.4149 0.128 Uiso 1 1 calc R . . 
H44B H 1.1374 0.6193 0.4847 0.128 Uiso 1 1 calc R . . 
H44C H 1.2449 0.5792 0.4324 0.128 Uiso 1 1 calc R . . 
C45 C 0.8239(4) 0.6512(3) 0.9381(3) 0.0200(12) Uani 1 1 d . . . 
H45A H 0.8417 0.5888 0.9637 0.024 Uiso 1 1 calc R . . 
H45B H 0.7441 0.6672 0.9365 0.024 Uiso 1 1 calc R . . 
C46 C 0.8486(4) 0.7020(3) 0.9790(3) 0.0140(11) Uani 1 1 d . . . 
C47 C 0.9236(4) 0.7548(3) 0.9568(3) 0.0195(12) Uani 1 1 d . . . 
H47 H 0.9735 0.7681 0.9100 0.023 Uiso 1 1 calc R . . 
C48 C 0.9736(5) 0.8398(4) 1.0238(3) 0.0277(14) Uani 1 1 d . . . 
H48A H 1.0506 0.8086 1.0265 0.033 Uiso 1 1 calc R . . 
H48B H 0.9388 0.8549 1.0711 0.033 Uiso 1 1 calc R . . 
C49 C 0.9754(5) 0.9220(4) 0.9592(3) 0.0245(13) Uani 1 1 d . . . 
C50 C 1.0681(5) 0.9292(4) 0.8997(3) 0.0295(14) Uani 1 1 d . . . 
C51 C 1.1643(5) 0.8608(4) 0.8960(3) 0.0321(14) Uani 1 1 d . . . 
H51 H 1.1657 0.8080 0.9347 0.039 Uiso 1 1 calc R . . 
C52 C 1.2527(5) 0.8703(4) 0.8383(4) 0.0370(16) Uani 1 1 d . . . 
H52 H 1.3153 0.8244 0.8373 0.044 Uiso 1 1 calc R . . 
C53 C 1.2524(5) 0.9488(5) 0.7789(4) 0.0395(16) Uani 1 1 d . . . 
H53 H 1.3150 0.9551 0.7388 0.047 Uiso 1 1 calc R . . 
C54 C 1.1638(5) 1.0137(4) 0.7796(3) 0.0354(15) Uani 1 1 d . . . 
H54 H 1.1642 1.0651 0.7393 0.043 Uiso 1 1 calc R . . 
C55 C 1.0697(5) 1.0074(4) 0.8391(3) 0.0302(14) Uani 1 1 d . . . 
C56 C 0.9787(5) 1.0753(4) 0.8398(3) 0.0314(14) Uani 1 1 d . . . 
H56 H 0.9796 1.1270 0.7998 0.038 Uiso 1 1 calc R . . 
C57 C 0.8839(5) 1.0682(4) 0.8999(4) 0.0307(14) Uani 1 1 d . . . 
C58 C 0.7916(5) 1.1379(4) 0.8986(4) 0.0375(16) Uani 1 1 d . . . 
H58 H 0.7931 1.1893 0.8584 0.045 Uiso 1 1 calc R . . 
C59 C 0.6996(6) 1.1304(4) 0.9563(4) 0.0419(17) Uani 1 1 d . . . 
H59 H 0.6377 1.1770 0.9561 0.050 Uiso 1 1 calc R . . 
C60 C 0.6979(5) 1.0543(4) 1.0150(4) 0.0392(16) Uani 1 1 d . . . 
H60 H 0.6341 1.0495 1.0543 0.047 Uiso 1 1 calc R . . 
C61 C 0.7855(5) 0.9872(4) 1.0169(3) 0.0337(15) Uani 1 1 d . . . 
H61 H 0.7819 0.9363 1.0575 0.040 Uiso 1 1 calc R . . 
C62 C 0.8831(5) 0.9914(4) 0.9591(3) 0.0295(14) Uani 1 1 d . . . 
C63 C 1.1073(4) 0.9643(3) 0.6318(3) 0.0194(12) Uani 1 1 d . . . 
H63A H 1.1191 0.9787 0.5769 0.023 Uiso 1 1 calc R . . 
H63B H 1.1729 0.9719 0.6442 0.023 Uiso 1 1 calc R . . 
C64 C 1.0059(4) 1.0210(3) 0.6611(3) 0.0201(12) Uani 1 1 d . . . 
C65 C 0.9079(4) 0.9989(3) 0.7030(3) 0.0225(12) Uani 1 1 d . . . 
H65 H 0.8904 0.9430 0.7226 0.027 Uiso 1 1 calc R . . 
C66 C 0.7235(4) 1.0902(3) 0.7465(3) 0.0268(13) Uani 1 1 d . . . 
H66A H 0.6865 1.1477 0.7195 0.032 Uiso 1 1 calc R . . 
H66B H 0.7165 1.0901 0.7983 0.032 Uiso 1 1 calc R . . 
C67 C 0.6671(4) 1.0218(3) 0.7469(3) 0.0233(13) Uani 1 1 d . . . 
C68 C 0.6410(4) 0.9551(3) 0.8132(3) 0.0213(12) Uani 1 1 d . . . 
C69 C 0.6667(5) 0.9478(4) 0.8828(3) 0.0280(14) Uani 1 1 d . . . 
H69 H 0.7030 0.9887 0.8850 0.034 Uiso 1 1 calc R . . 
C70 C 0.6400(5) 0.8835(4) 0.9447(3) 0.0359(15) Uani 1 1 d . . . 
H70 H 0.6574 0.8806 0.9898 0.043 Uiso 1 1 calc R . . 
C71 C 0.5878(5) 0.8214(4) 0.9441(3) 0.0373(16) Uani 1 1 d . . . 
H71 H 0.5702 0.7769 0.9885 0.045 Uiso 1 1 calc R . . 
C72 C 0.5619(5) 0.8246(4) 0.8800(3) 0.0307(14) Uani 1 1 d . . . 
H72 H 0.5261 0.7820 0.8801 0.037 Uiso 1 1 calc R . . 
C73 C 0.5881(4) 0.8913(3) 0.8122(3) 0.0220(12) Uani 1 1 d . . . 
C74 C 0.5664(4) 0.8932(4) 0.7462(3) 0.0266(13) Uani 1 1 d . . . 
H74 H 0.5317 0.8502 0.7461 0.032 Uiso 1 1 calc R . . 
C75 C 0.5942(4) 0.9570(4) 0.6793(3) 0.0246(13) Uani 1 1 d . . . 
C76 C 0.5760(5) 0.9567(4) 0.6111(4) 0.0349(15) Uani 1 1 d . . . 
H76 H 0.5405 0.9143 0.6106 0.042 Uiso 1 1 calc R . . 
C77 C 0.6089(5) 1.0169(4) 0.5458(4) 0.0416(17) Uani 1 1 d . . . 
H77 H 0.5992 1.0146 0.5001 0.050 Uiso 1 1 calc R . . 
C78 C 0.6568(5) 1.0818(4) 0.5465(4) 0.0392(16) Uani 1 1 d . . . 
H78 H 0.6762 1.1248 0.5013 0.047 Uiso 1 1 calc R . . 
C79 C 0.6758(5) 1.0845(4) 0.6095(3) 0.0329(14) Uani 1 1 d . . . 
H79 H 0.7101 1.1288 0.6075 0.039 Uiso 1 1 calc R . . 
C80 C 0.6461(4) 1.0226(3) 0.6800(3) 0.0208(12) Uani 1 1 d . . . 
C81 C 0.2960(5) 0.5943(4) 0.9772(4) 0.0344(15) Uani 1 1 d . . . 
H81 H 0.2905 0.6033 0.9249 0.041 Uiso 1 1 calc R . . 
Cl1 Cl 0.16140(16) 0.61278(13) 1.03046(13) 0.0645(6) Uani 1 1 d . . . 
Cl2 Cl 0.36230(14) 0.48790(11) 1.01159(11) 0.0478(5) Uani 1 1 d . . . 
Cl3 Cl 0.37156(16) 0.66755(11) 0.97563(12) 0.0592(6) Uani 1 1 d . . . 
C82 C 0.6218(6) 0.8002(4) 0.2036(4) 0.0403(16) Uani 1 1 d . . . 
H82 H 0.6863 0.7613 0.1811 0.048 Uiso 1 1 calc R . . 
Cl4 Cl 0.56053(18) 0.73966(14) 0.29102(11) 0.0646(6) Uani 1 1 d . . . 
Cl5 Cl 0.52801(14) 0.84473(12) 0.14353(10) 0.0499(5) Uani 1 1 d . . . 
Cl6 Cl 0.6702(2) 0.88146(15) 0.21392(11) 0.0757(7) Uani 1 1 d . . . 
 
loop_ 
 _atom_site_aniso_label 
 _atom_site_aniso_U_11 
 _atom_site_aniso_U_22 
 _atom_site_aniso_U_33 
 _atom_site_aniso_U_23 
 _atom_site_aniso_U_13 
 _atom_site_aniso_U_12 
O1 0.026(2) 0.025(2) 0.0124(19) 0.0007(16) -0.0056(16) -0.0140(17) 
O2 0.032(2) 0.022(2) 0.0094(18) -0.0025(15) 0.0008(16) -0.0168(17) 
O3 0.021(2) 0.021(2) 0.016(2) 0.0026(16) -0.0009(16) -0.0033(17) 
O4 0.0217(19) 0.0148(19) 0.0116(18) -0.0002(15) 0.0022(15) -0.0036(16) 
N1 0.031(3) 0.020(2) 0.013(2) -0.0004(19) -0.001(2) -0.007(2) 
N2 0.035(3) 0.023(3) 0.014(2) -0.005(2) -0.001(2) -0.007(2) 
N3 0.029(3) 0.018(2) 0.017(2) -0.0045(19) -0.006(2) -0.008(2) 
N4 0.026(3) 0.021(3) 0.023(3) -0.005(2) 0.002(2) -0.005(2) 
N5 0.029(3) 0.014(2) 0.033(3) -0.003(2) -0.002(2) -0.010(2) 
N6 0.020(2) 0.018(2) 0.024(3) -0.003(2) -0.004(2) -0.005(2) 
C1 0.018(3) 0.010(3) 0.019(3) 0.000(2) -0.012(2) 0.001(2) 
C2 0.018(3) 0.012(3) 0.021(3) 0.003(2) -0.012(2) 0.000(2) 
C3 0.015(3) 0.024(3) 0.017(3) 0.000(2) -0.004(2) -0.005(2) 
C4 0.021(3) 0.018(3) 0.014(3) -0.006(2) -0.010(2) 0.003(2) 
C5 0.013(3) 0.015(3) 0.030(3) -0.009(2) -0.005(2) -0.002(2) 
C6 0.016(3) 0.017(3) 0.014(3) -0.005(2) -0.001(2) -0.002(2) 
C7 0.015(3) 0.022(3) 0.017(3) -0.009(2) 0.000(2) -0.003(2) 
C8 0.010(2) 0.015(3) 0.016(3) -0.001(2) 0.001(2) -0.005(2) 
C9 0.018(3) 0.014(3) 0.007(2) 0.002(2) 0.002(2) -0.008(2) 
C10 0.015(3) 0.026(3) 0.013(3) 0.002(2) -0.001(2) -0.010(2) 
C11 0.017(3) 0.022(3) 0.020(3) -0.001(2) -0.003(2) 0.000(2) 
C12 0.019(3) 0.021(3) 0.019(3) -0.007(2) 0.004(2) -0.002(2) 
C13 0.017(3) 0.024(3) 0.013(3) -0.003(2) -0.003(2) -0.008(2) 
C14 0.015(3) 0.049(4) 0.010(3) 0.002(3) 0.001(2) -0.014(3) 
C15 0.018(3) 0.029(3) 0.008(3) -0.002(2) -0.008(2) -0.006(2) 
C16 0.018(3) 0.022(3) 0.013(3) -0.008(2) -0.009(2) 0.001(2) 
C17 0.019(3) 0.020(3) 0.017(3) -0.005(2) -0.008(2) -0.004(2) 
C18 0.016(3) 0.025(3) 0.018(3) -0.006(2) -0.003(2) -0.006(2) 
C19 0.021(3) 0.016(3) 0.023(3) -0.005(2) -0.013(2) 0.000(2) 
C20 0.027(3) 0.022(3) 0.014(3) 0.002(2) -0.010(2) -0.007(3) 
C21 0.021(3) 0.013(3) 0.019(3) -0.003(2) -0.006(2) -0.003(2) 
C22 0.013(3) 0.014(3) 0.015(3) 0.007(2) 0.002(2) -0.008(2) 
C23 0.015(3) 0.009(2) 0.012(3) 0.002(2) 0.003(2) -0.005(2) 
C24 0.015(3) 0.022(3) 0.015(3) 0.005(2) -0.003(2) -0.008(2) 
C25 0.024(3) 0.025(3) 0.021(3) -0.003(2) -0.010(2) -0.010(3) 
C26 0.029(3) 0.024(3) 0.015(3) -0.004(2) 0.004(2) -0.016(3) 
C27 0.016(3) 0.018(3) 0.020(3) -0.005(2) 0.002(2) -0.003(2) 
C28 0.023(3) 0.020(3) 0.022(3) 0.005(2) -0.012(2) -0.010(2) 
C29 0.034(3) 0.036(4) 0.021(3) -0.008(3) -0.006(3) -0.013(3) 
C30 0.114(8) 0.076(6) 0.089(7) -0.060(6) -0.058(6) 0.013(6) 
C31 0.039(4) 0.135(8) 0.050(5) -0.035(5) -0.015(4) -0.030(5) 
C32 0.148(10) 0.148(9) 0.036(5) 0.022(5) -0.050(6) -0.112(8) 
C33 0.035(3) 0.027(3) 0.035(4) -0.016(3) 0.004(3) -0.003(3) 
C34 0.073(6) 0.069(6) 0.061(5) -0.047(5) -0.025(4) 0.044(5) 
C35 0.108(8) 0.054(5) 0.118(8) -0.062(6) 0.056(6) -0.049(6) 
C36 0.086(6) 0.056(5) 0.049(5) -0.033(4) -0.031(4) 0.012(4) 
C37 0.027(3) 0.026(3) 0.037(4) -0.010(3) -0.004(3) 0.001(3) 
C38 0.064(5) 0.046(5) 0.045(5) -0.018(4) 0.001(4) 0.020(4) 
C39 0.024(3) 0.041(4) 0.070(5) -0.005(4) -0.017(3) 0.000(3) 
C40 0.043(4) 0.022(3) 0.055(5) 0.002(3) -0.013(4) 0.007(3) 
C41 0.052(4) 0.039(4) 0.034(4) -0.023(3) 0.002(3) -0.012(3) 
C42 0.080(6) 0.116(8) 0.113(8) -0.099(7) 0.051(6) -0.040(6) 
C43 0.117(8) 0.037(5) 0.081(6) -0.030(4) -0.036(6) 0.000(5) 
C44 0.114(8) 0.080(6) 0.098(7) -0.067(6) -0.060(6) 0.018(6) 
C45 0.021(3) 0.024(3) 0.011(3) 0.000(2) 0.003(2) -0.011(2) 
C46 0.010(2) 0.015(3) 0.016(3) -0.003(2) -0.002(2) -0.003(2) 
C47 0.017(3) 0.022(3) 0.017(3) -0.009(2) 0.000(2) 0.000(2) 
C48 0.033(3) 0.031(3) 0.027(3) -0.015(3) -0.007(3) -0.011(3) 
C49 0.030(3) 0.026(3) 0.027(3) -0.013(3) -0.009(3) -0.010(3) 
C50 0.029(3) 0.034(4) 0.039(4) -0.017(3) -0.010(3) -0.014(3) 
C51 0.032(3) 0.033(4) 0.039(4) -0.012(3) -0.017(3) -0.007(3) 
C52 0.029(3) 0.045(4) 0.047(4) -0.023(3) -0.013(3) -0.005(3) 
C53 0.032(4) 0.056(5) 0.039(4) -0.023(4) 0.001(3) -0.017(3) 
C54 0.047(4) 0.042(4) 0.026(3) -0.007(3) -0.009(3) -0.023(3) 
C55 0.042(4) 0.032(3) 0.029(3) -0.015(3) -0.011(3) -0.015(3) 
C56 0.040(4) 0.025(3) 0.034(4) -0.007(3) -0.014(3) -0.011(3) 
C57 0.031(3) 0.022(3) 0.048(4) -0.016(3) -0.011(3) -0.009(3) 
C58 0.035(4) 0.031(4) 0.051(4) -0.015(3) -0.014(3) -0.007(3) 
C59 0.049(4) 0.028(4) 0.053(4) -0.020(3) -0.015(4) 0.003(3) 
C60 0.036(4) 0.042(4) 0.043(4) -0.025(3) 0.004(3) -0.008(3) 
C61 0.048(4) 0.031(4) 0.028(3) -0.014(3) -0.008(3) -0.009(3) 
C62 0.033(3) 0.038(4) 0.027(3) -0.016(3) -0.010(3) -0.009(3) 
C63 0.021(3) 0.016(3) 0.020(3) -0.004(2) -0.002(2) -0.005(2) 
C64 0.026(3) 0.019(3) 0.018(3) -0.005(2) -0.007(2) -0.007(2) 
C65 0.021(3) 0.012(3) 0.032(3) -0.003(2) -0.006(3) -0.004(2) 
C66 0.025(3) 0.014(3) 0.035(3) -0.007(3) 0.003(3) -0.003(2) 
C67 0.020(3) 0.020(3) 0.022(3) -0.004(2) 0.005(2) -0.003(2) 
C68 0.011(3) 0.025(3) 0.024(3) -0.012(2) 0.003(2) 0.001(2) 
C69 0.029(3) 0.028(3) 0.030(3) -0.012(3) -0.009(3) -0.001(3) 
C70 0.038(4) 0.035(4) 0.023(3) -0.001(3) -0.009(3) 0.004(3) 
C71 0.034(4) 0.027(3) 0.023(4) 0.008(3) 0.007(3) 0.004(3) 
C72 0.020(3) 0.024(3) 0.034(4) -0.002(3) 0.006(3) -0.002(3) 
C73 0.010(3) 0.022(3) 0.029(3) -0.009(3) 0.000(2) 0.002(2) 
C74 0.020(3) 0.024(3) 0.035(4) -0.010(3) -0.001(3) -0.005(3) 
C75 0.015(3) 0.030(3) 0.026(3) -0.011(3) -0.003(2) 0.001(3) 
C76 0.031(3) 0.037(4) 0.040(4) -0.009(3) -0.018(3) -0.004(3) 
C77 0.040(4) 0.051(4) 0.035(4) -0.016(3) -0.007(3) -0.004(3) 
C78 0.034(4) 0.042(4) 0.027(4) 0.004(3) 0.001(3) -0.009(3) 
C79 0.030(3) 0.032(4) 0.031(4) 0.004(3) -0.009(3) -0.011(3) 
C80 0.012(3) 0.019(3) 0.026(3) -0.006(2) 0.004(2) -0.001(2) 
C81 0.033(3) 0.039(4) 0.034(4) -0.011(3) -0.002(3) -0.015(3) 
Cl1 0.0409(11) 0.0585(13) 0.0853(15) -0.0250(11) 0.0057(10) -0.0099(9) 
Cl2 0.0451(10) 0.0350(9) 0.0654(12) -0.0090(8) -0.0172(9) -0.0126(8) 
Cl3 0.0614(12) 0.0376(10) 0.0862(15) 0.0015(10) -0.0357(11) -0.0253(9) 
C82 0.044(4) 0.039(4) 0.037(4) -0.012(3) -0.002(3) -0.013(3) 
Cl4 0.0763(14) 0.0675(13) 0.0450(11) -0.0009(10) -0.0002(10) -0.0383(12) 
Cl5 0.0456(10) 0.0550(11) 0.0495(11) -0.0249(9) -0.0090(8) 0.0011(9) 
Cl6 0.1132(19) 0.0849(16) 0.0512(12) -0.0176(11) -0.0061(12) -0.0683(15) 
 
_geom_special_details 
; 
 All esds (except the esd in the dihedral angle between two l.s. planes) 
 are estimated using the full covariance matrix.  The cell esds are taken 
 into account individually in the estimation of esds in distances, angles 
 and torsion angles; correlations between esds in cell parameters are only 
 used when they are defined by crystal symmetry.  An approximate (isotropic) 
 treatment of cell esds is used for estimating esds involving l.s. planes. 
; 
 
loop_ 
 _geom_bond_atom_site_label_1 
 _geom_bond_atom_site_label_2 
 _geom_bond_distance 
 _geom_bond_site_symmetry_2 
 _geom_bond_publ_flag 
O1 C1 1.370(6) . ? 
O1 H1A 0.8400 . ? 
O2 C9 1.388(6) . ? 
O2 C45 1.432(6) . ? 
O3 C16 1.363(6) . ? 
O3 H3A 0.8400 . ? 
O4 C23 1.394(6) . ? 
O4 C63 1.442(6) . ? 
N1 N2 1.322(6) . ? 
N1 C46 1.356(6) . ? 
N2 N3 1.341(6) . ? 
N3 C47 1.337(6) . ? 
N3 C48 1.468(7) . ? 
N4 N5 1.326(6) . ? 
N4 C64 1.358(7) . ? 
N5 N6 1.349(6) . ? 
N6 C65 1.343(7) . ? 
N6 C66 1.473(7) . ? 
C1 C6 1.401(7) . ? 
C1 C2 1.401(7) . ? 
C2 C3 1.385(7) . ? 
C2 C28 1.516(7) . ? 
C3 C4 1.378(7) . ? 
C3 H3 0.9500 . ? 
C4 C5 1.404(7) . ? 
C4 C29 1.542(7) . ? 
C5 C6 1.397(7) . ? 
C5 H5 0.9500 . ? 
C6 C7 1.508(7) . ? 
C7 C8 1.524(7) . ? 
C7 H7A 0.9900 . ? 
C7 H7B 0.9900 . ? 
C8 C9 1.387(7) . ? 
C8 C13 1.389(7) . ? 
C9 C10 1.398(7) . ? 
C10 C11 1.385(7) . ? 
C10 C14 1.521(7) . ? 
C11 C12 1.390(7) . ? 
C11 H11 0.9500 . ? 
C12 C13 1.401(7) . ? 
C12 C33 1.536(7) . ? 
C13 H13 0.9500 . ? 
C14 C15 1.526(7) . ? 
C14 H14A 0.9900 . ? 
C14 H14B 0.9900 . ? 
C15 C20 1.391(7) . ? 
C15 C16 1.396(7) . ? 
C16 C17 1.404(7) . ? 
C17 C18 1.377(7) . ? 
C17 C21 1.522(7) . ? 
C18 C19 1.389(7) . ? 
C18 H18 0.9500 . ? 
C19 C20 1.391(7) . ? 
C19 C37 1.540(7) . ? 
C20 H20 0.9500 . ? 
C21 C22 1.513(7) . ? 
C21 H21A 0.9900 . ? 
C21 H21B 0.9900 . ? 
C22 C27 1.386(7) . ? 
C22 C23 1.399(7) . ? 
C23 C24 1.399(7) . ? 
C24 C25 1.393(7) . ? 
C24 C28 1.522(7) . ? 
C25 C26 1.390(8) . ? 
C25 H25 0.9500 . ? 
C26 C27 1.400(7) . ? 
C26 C41 1.532(8) . ? 
C27 H27 0.9500 . ? 
C28 H28A 0.9900 . ? 
C28 H28B 0.9900 . ? 
C29 C32 1.513(9) . ? 
C29 C31 1.520(9) . ? 
C29 C30 1.524(9) . ? 
C30 H30A 0.9800 . ? 
C30 H30B 0.9800 . ? 
C30 H30C 0.9800 . ? 
C31 H31A 0.9800 . ? 
C31 H31B 0.9800 . ? 
C31 H31C 0.9800 . ? 
C32 H32A 0.9800 . ? 
C32 H32B 0.9800 . ? 
C32 H32C 0.9800 . ? 
C33 C36 1.513(9) . ? 
C33 C34 1.532(9) . ? 
C33 C35 1.540(10) . ? 
C34 H34A 0.9800 . ? 
C34 H34B 0.9800 . ? 
C34 H34C 0.9800 . ? 
C35 H35A 0.9800 . ? 
C35 H35B 0.9800 . ? 
C35 H35C 0.9800 . ? 
C36 H36A 0.9800 . ? 
C36 H36B 0.9800 . ? 
C36 H36C 0.9800 . ? 
C37 C40 1.524(8) . ? 
C37 C38 1.531(9) . ? 
C37 C39 1.548(9) . ? 
C38 H38A 0.9800 . ? 
C38 H38B 0.9800 . ? 
C38 H38C 0.9800 . ? 
C39 H39A 0.9800 . ? 
C39 H39B 0.9800 . ? 
C39 H39C 0.9800 . ? 
C40 H40A 0.9800 . ? 
C40 H40B 0.9800 . ? 
C40 H40C 0.9800 . ? 
C41 C44 1.510(10) . ? 
C41 C42 1.510(10) . ? 
C41 C43 1.541(10) . ? 
C42 H42A 0.9800 . ? 
C42 H42B 0.9800 . ? 
C42 H42C 0.9800 . ? 
C43 H43A 0.9800 . ? 
C43 H43B 0.9800 . ? 
C43 H43C 0.9800 . ? 
C44 H44A 0.9800 . ? 
C44 H44B 0.9800 . ? 
C44 H44C 0.9800 . ? 
C45 C46 1.495(7) . ? 
C45 H45A 0.9900 . ? 
C45 H45B 0.9900 . ? 
C46 C47 1.369(7) . ? 
C47 H47 0.9500 . ? 
C48 C49 1.521(8) . ? 
C48 H48A 0.9900 . ? 
C48 H48B 0.9900 . ? 
C49 C50 1.407(8) . ? 
C49 C62 1.417(8) . ? 
C50 C55 1.438(8) . ? 
C50 C51 1.442(8) . ? 
C51 C52 1.353(9) . ? 
C51 H51 0.9500 . ? 
C52 C53 1.430(9) . ? 
C52 H52 0.9500 . ? 
C53 C54 1.344(9) . ? 
C53 H53 0.9500 . ? 
C54 C55 1.417(8) . ? 
C54 H54 0.9500 . ? 
C55 C56 1.392(8) . ? 
C56 C57 1.431(8) . ? 
C56 H56 0.9500 . ? 
C57 C62 1.409(8) . ? 
C57 C58 1.419(8) . ? 
C58 C59 1.382(9) . ? 
C58 H58 0.9500 . ? 
C59 C60 1.398(9) . ? 
C59 H59 0.9500 . ? 
C60 C61 1.355(9) . ? 
C60 H60 0.9500 . ? 
C61 C62 1.428(8) . ? 
C61 H61 0.9500 . ? 
C63 C64 1.483(7) . ? 
C63 H63A 0.9900 . ? 
C63 H63B 0.9900 . ? 
C64 C65 1.362(7) . ? 
C65 H65 0.9500 . ? 
C66 C67 1.516(8) . ? 
C66 H66A 0.9900 . ? 
C66 H66B 0.9900 . ? 
C67 C80 1.401(8) . ? 
C67 C68 1.420(8) . ? 
C68 C73 1.428(8) . ? 
C68 C69 1.444(8) . ? 
C69 C70 1.351(8) . ? 
C69 H69 0.9500 . ? 
C70 C71 1.392(9) . ? 
C70 H70 0.9500 . ? 
C71 C72 1.365(9) . ? 
C71 H71 0.9500 . ? 
C72 C73 1.437(8) . ? 
C72 H72 0.9500 . ? 
C73 C74 1.381(8) . ? 
C74 C75 1.406(8) . ? 
C74 H74 0.9500 . ? 
C75 C76 1.419(8) . ? 
C75 C80 1.442(8) . ? 
C76 C77 1.370(9) . ? 
C76 H76 0.9500 . ? 
C77 C78 1.398(9) . ? 
C77 H77 0.9500 . ? 
C78 C79 1.337(9) . ? 
C78 H78 0.9500 . ? 
C79 C80 1.439(8) . ? 
C79 H79 0.9500 . ? 
C81 Cl2 1.746(7) . ? 
C81 Cl1 1.752(6) . ? 
C81 Cl3 1.754(6) . ? 
C81 H81 1.0000 . ? 
C82 Cl6 1.739(7) . ? 
C82 Cl4 1.750(7) . ? 
C82 Cl5 1.757(7) . ? 
C82 H82 1.0000 . ? 
 
loop_ 
 _geom_angle_atom_site_label_1 
 _geom_angle_atom_site_label_2 
 _geom_angle_atom_site_label_3 
 _geom_angle 
 _geom_angle_site_symmetry_1 
 _geom_angle_site_symmetry_3 
 _geom_angle_publ_flag 
C1 O1 H1A 109.5 . . ? 
C9 O2 C45 114.1(4) . . ? 
C16 O3 H3A 109.5 . . ? 
C23 O4 C63 115.4(4) . . ? 
N2 N1 C46 108.6(4) . . ? 
N1 N2 N3 107.2(4) . . ? 
C47 N3 N2 110.8(4) . . ? 
C47 N3 C48 129.3(5) . . ? 
N2 N3 C48 119.9(4) . . ? 
N5 N4 C64 108.2(4) . . ? 
N4 N5 N6 106.7(4) . . ? 
C65 N6 N5 111.4(4) . . ? 
C65 N6 C66 128.5(4) . . ? 
N5 N6 C66 120.0(4) . . ? 
O1 C1 C6 119.1(4) . . ? 
O1 C1 C2 120.4(4) . . ? 
C6 C1 C2 120.5(4) . . ? 
C3 C2 C1 118.8(5) . . ? 
C3 C2 C28 121.2(5) . . ? 
C1 C2 C28 119.9(4) . . ? 
C4 C3 C2 123.0(5) . . ? 
C4 C3 H3 118.5 . . ? 
C2 C3 H3 118.5 . . ? 
C3 C4 C5 117.0(4) . . ? 
C3 C4 C29 122.7(5) . . ? 
C5 C4 C29 120.3(5) . . ? 
C6 C5 C4 122.4(5) . . ? 
C6 C5 H5 118.8 . . ? 
C4 C5 H5 118.8 . . ? 
C5 C6 C1 118.2(5) . . ? 
C5 C6 C7 121.2(5) . . ? 
C1 C6 C7 120.4(4) . . ? 
C6 C7 C8 110.7(4) . . ? 
C6 C7 H7A 109.5 . . ? 
C8 C7 H7A 109.5 . . ? 
C6 C7 H7B 109.5 . . ? 
C8 C7 H7B 109.5 . . ? 
H7A C7 H7B 108.1 . . ? 
C9 C8 C13 117.8(4) . . ? 
C9 C8 C7 122.3(4) . . ? 
C13 C8 C7 119.7(4) . . ? 
C8 C9 O2 119.6(4) . . ? 
C8 C9 C10 121.5(4) . . ? 
O2 C9 C10 118.9(4) . . ? 
C11 C10 C9 118.5(5) . . ? 
C11 C10 C14 120.1(5) . . ? 
C9 C10 C14 121.4(5) . . ? 
C10 C11 C12 122.4(5) . . ? 
C10 C11 H11 118.8 . . ? 
C12 C11 H11 118.8 . . ? 
C11 C12 C13 116.8(5) . . ? 
C11 C12 C33 123.4(5) . . ? 
C13 C12 C33 119.8(5) . . ? 
C8 C13 C12 122.9(5) . . ? 
C8 C13 H13 118.5 . . ? 
C12 C13 H13 118.5 . . ? 
C10 C14 C15 112.7(4) . . ? 
C10 C14 H14A 109.1 . . ? 
C15 C14 H14A 109.1 . . ? 
C10 C14 H14B 109.1 . . ? 
C15 C14 H14B 109.1 . . ? 
H14A C14 H14B 107.8 . . ? 
C20 C15 C16 119.2(5) . . ? 
C20 C15 C14 120.0(5) . . ? 
C16 C15 C14 120.8(5) . . ? 
O3 C16 C15 120.7(5) . . ? 
O3 C16 C17 119.4(5) . . ? 
C15 C16 C17 119.9(5) . . ? 
C18 C17 C16 118.4(5) . . ? 
C18 C17 C21 122.2(5) . . ? 
C16 C17 C21 118.8(4) . . ? 
C17 C18 C19 123.8(5) . . ? 
C17 C18 H18 118.1 . . ? 
C19 C18 H18 118.1 . . ? 
C18 C19 C20 116.4(5) . . ? 
C18 C19 C37 120.2(5) . . ? 
C20 C19 C37 123.4(5) . . ? 
C15 C20 C19 122.4(5) . . ? 
C15 C20 H20 118.8 . . ? 
C19 C20 H20 118.8 . . ? 
C22 C21 C17 109.0(4) . . ? 
C22 C21 H21A 109.9 . . ? 
C17 C21 H21A 109.9 . . ? 
C22 C21 H21B 109.9 . . ? 
C17 C21 H21B 109.9 . . ? 
H21A C21 H21B 108.3 . . ? 
C27 C22 C23 117.6(5) . . ? 
C27 C22 C21 120.4(5) . . ? 
C23 C22 C21 121.8(4) . . ? 
O4 C23 C22 118.4(4) . . ? 
O4 C23 C24 119.4(4) . . ? 
C22 C23 C24 121.9(5) . . ? 
C25 C24 C23 117.9(5) . . ? 
C25 C24 C28 119.6(5) . . ? 
C23 C24 C28 122.4(5) . . ? 
C26 C25 C24 122.4(5) . . ? 
C26 C25 H25 118.8 . . ? 
C24 C25 H25 118.8 . . ? 
C25 C26 C27 117.3(5) . . ? 
C25 C26 C41 123.3(5) . . ? 
C27 C26 C41 119.5(5) . . ? 
C22 C27 C26 122.9(5) . . ? 
C22 C27 H27 118.6 . . ? 
C26 C27 H27 118.6 . . ? 
C2 C28 C24 111.0(4) . . ? 
C2 C28 H28A 109.4 . . ? 
C24 C28 H28A 109.4 . . ? 
C2 C28 H28B 109.4 . . ? 
C24 C28 H28B 109.4 . . ? 
H28A C28 H28B 108.0 . . ? 
C32 C29 C31 107.4(7) . . ? 
C32 C29 C30 108.9(7) . . ? 
C31 C29 C30 108.6(6) . . ? 
C32 C29 C4 112.1(5) . . ? 
C31 C29 C4 110.9(5) . . ? 
C30 C29 C4 108.8(5) . . ? 
C29 C30 H30A 109.5 . . ? 
C29 C30 H30B 109.5 . . ? 
H30A C30 H30B 109.5 . . ? 
C29 C30 H30C 109.5 . . ? 
H30A C30 H30C 109.5 . . ? 
H30B C30 H30C 109.5 . . ? 
C29 C31 H31A 109.5 . . ? 
C29 C31 H31B 109.5 . . ? 
H31A C31 H31B 109.5 . . ? 
C29 C31 H31C 109.5 . . ? 
H31A C31 H31C 109.5 . . ? 
H31B C31 H31C 109.5 . . ? 
C29 C32 H32A 109.5 . . ? 
C29 C32 H32B 109.5 . . ? 
H32A C32 H32B 109.5 . . ? 
C29 C32 H32C 109.5 . . ? 
H32A C32 H32C 109.5 . . ? 
H32B C32 H32C 109.5 . . ? 
C36 C33 C34 106.7(5) . . ? 
C36 C33 C12 111.6(5) . . ? 
C34 C33 C12 112.3(5) . . ? 
C36 C33 C35 109.2(7) . . ? 
C34 C33 C35 108.3(7) . . ? 
C12 C33 C35 108.6(5) . . ? 
C33 C34 H34A 109.5 . . ? 
C33 C34 H34B 109.5 . . ? 
H34A C34 H34B 109.5 . . ? 
C33 C34 H34C 109.5 . . ? 
H34A C34 H34C 109.5 . . ? 
H34B C34 H34C 109.5 . . ? 
C33 C35 H35A 109.5 . . ? 
C33 C35 H35B 109.5 . . ? 
H35A C35 H35B 109.5 . . ? 
C33 C35 H35C 109.5 . . ? 
H35A C35 H35C 109.5 . . ? 
H35B C35 H35C 109.5 . . ? 
C33 C36 H36A 109.5 . . ? 
C33 C36 H36B 109.5 . . ? 
H36A C36 H36B 109.5 . . ? 
C33 C36 H36C 109.5 . . ? 
H36A C36 H36C 109.5 . . ? 
H36B C36 H36C 109.5 . . ? 
C40 C37 C38 110.1(5) . . ? 
C40 C37 C19 112.1(5) . . ? 
C38 C37 C19 108.6(5) . . ? 
C40 C37 C39 107.3(5) . . ? 
C38 C37 C39 109.9(6) . . ? 
C19 C37 C39 108.8(5) . . ? 
C37 C38 H38A 109.5 . . ? 
C37 C38 H38B 109.5 . . ? 
H38A C38 H38B 109.5 . . ? 
C37 C38 H38C 109.5 . . ? 
H38A C38 H38C 109.5 . . ? 
H38B C38 H38C 109.5 . . ? 
C37 C39 H39A 109.5 . . ? 
C37 C39 H39B 109.5 . . ? 
H39A C39 H39B 109.5 . . ? 
C37 C39 H39C 109.5 . . ? 
H39A C39 H39C 109.5 . . ? 
H39B C39 H39C 109.5 . . ? 
C37 C40 H40A 109.5 . . ? 
C37 C40 H40B 109.5 . . ? 
H40A C40 H40B 109.5 . . ? 
C37 C40 H40C 109.5 . . ? 
H40A C40 H40C 109.5 . . ? 
H40B C40 H40C 109.5 . . ? 
C44 C41 C42 110.0(7) . . ? 
C44 C41 C26 112.1(6) . . ? 
C42 C41 C26 109.8(5) . . ? 
C44 C41 C43 108.3(7) . . ? 
C42 C41 C43 107.7(7) . . ? 
C26 C41 C43 108.7(5) . . ? 
C41 C42 H42A 109.5 . . ? 
C41 C42 H42B 109.5 . . ? 
H42A C42 H42B 109.5 . . ? 
C41 C42 H42C 109.5 . . ? 
H42A C42 H42C 109.5 . . ? 
H42B C42 H42C 109.5 . . ? 
C41 C43 H43A 109.5 . . ? 
C41 C43 H43B 109.5 . . ? 
H43A C43 H43B 109.5 . . ? 
C41 C43 H43C 109.5 . . ? 
H43A C43 H43C 109.5 . . ? 
H43B C43 H43C 109.5 . . ? 
C41 C44 H44A 109.5 . . ? 
C41 C44 H44B 109.5 . . ? 
H44A C44 H44B 109.5 . . ? 
C41 C44 H44C 109.5 . . ? 
H44A C44 H44C 109.5 . . ? 
H44B C44 H44C 109.5 . . ? 
O2 C45 C46 108.3(4) . . ? 
O2 C45 H45A 110.0 . . ? 
C46 C45 H45A 110.0 . . ? 
O2 C45 H45B 110.0 . . ? 
C46 C45 H45B 110.0 . . ? 
H45A C45 H45B 108.4 . . ? 
N1 C46 C47 108.1(4) . . ? 
N1 C46 C45 121.8(4) . . ? 
C47 C46 C45 130.1(4) . . ? 
N3 C47 C46 105.3(4) . . ? 
N3 C47 H47 127.4 . . ? 
C46 C47 H47 127.4 . . ? 
N3 C48 C49 111.2(4) . . ? 
N3 C48 H48A 109.4 . . ? 
C49 C48 H48A 109.4 . . ? 
N3 C48 H48B 109.4 . . ? 
C49 C48 H48B 109.4 . . ? 
H48A C48 H48B 108.0 . . ? 
C50 C49 C62 120.0(5) . . ? 
C50 C49 C48 120.3(5) . . ? 
C62 C49 C48 119.7(5) . . ? 
C49 C50 C55 120.0(5) . . ? 
C49 C50 C51 122.9(6) . . ? 
C55 C50 C51 117.1(5) . . ? 
C52 C51 C50 121.3(6) . . ? 
C52 C51 H51 119.3 . . ? 
C50 C51 H51 119.3 . . ? 
C51 C52 C53 120.5(6) . . ? 
C51 C52 H52 119.8 . . ? 
C53 C52 H52 119.8 . . ? 
C54 C53 C52 120.1(6) . . ? 
C54 C53 H53 119.9 . . ? 
C52 C53 H53 119.9 . . ? 
C53 C54 C55 121.6(6) . . ? 
C53 C54 H54 119.2 . . ? 
C55 C54 H54 119.2 . . ? 
C56 C55 C54 121.2(6) . . ? 
C56 C55 C50 119.5(6) . . ? 
C54 C55 C50 119.4(6) . . ? 
C55 C56 C57 120.8(6) . . ? 
C55 C56 H56 119.6 . . ? 
C57 C56 H56 119.6 . . ? 
C62 C57 C58 121.0(6) . . ? 
C62 C57 C56 119.4(5) . . ? 
C58 C57 C56 119.6(6) . . ? 
C59 C58 C57 119.5(6) . . ? 
C59 C58 H58 120.3 . . ? 
C57 C58 H58 120.3 . . ? 
C58 C59 C60 119.9(6) . . ? 
C58 C59 H59 120.1 . . ? 
C60 C59 H59 120.1 . . ? 
C61 C60 C59 121.2(6) . . ? 
C61 C60 H60 119.4 . . ? 
C59 C60 H60 119.4 . . ? 
C60 C61 C62 121.4(6) . . ? 
C60 C61 H61 119.3 . . ? 
C62 C61 H61 119.3 . . ? 
C57 C62 C49 120.3(5) . . ? 
C57 C62 C61 117.0(6) . . ? 
C49 C62 C61 122.6(6) . . ? 
O4 C63 C64 107.4(4) . . ? 
O4 C63 H63A 110.2 . . ? 
C64 C63 H63A 110.2 . . ? 
O4 C63 H63B 110.2 . . ? 
C64 C63 H63B 110.2 . . ? 
H63A C63 H63B 108.5 . . ? 
N4 C64 C65 109.4(5) . . ? 
N4 C64 C63 122.7(5) . . ? 
C65 C64 C63 127.8(5) . . ? 
N6 C65 C64 104.3(4) . . ? 
N6 C65 H65 127.9 . . ? 
C64 C65 H65 127.9 . . ? 
N6 C66 C67 110.6(4) . . ? 
N6 C66 H66A 109.5 . . ? 
C67 C66 H66A 109.5 . . ? 
N6 C66 H66B 109.5 . . ? 
C67 C66 H66B 109.5 . . ? 
H66A C66 H66B 108.1 . . ? 
C80 C67 C68 120.2(5) . . ? 
C80 C67 C66 119.1(5) . . ? 
C68 C67 C66 120.6(5) . . ? 
C67 C68 C73 119.6(5) . . ? 
C67 C68 C69 122.9(5) . . ? 
C73 C68 C69 117.5(5) . . ? 
C70 C69 C68 121.0(6) . . ? 
C70 C69 H69 119.5 . . ? 
C68 C69 H69 119.5 . . ? 
C69 C70 C71 121.7(6) . . ? 
C69 C70 H70 119.1 . . ? 
C71 C70 H70 119.1 . . ? 
C72 C71 C70 120.1(6) . . ? 
C72 C71 H71 120.0 . . ? 
C70 C71 H71 120.0 . . ? 
C71 C72 C73 120.9(6) . . ? 
C71 C72 H72 119.5 . . ? 
C73 C72 H72 119.5 . . ? 
C74 C73 C68 119.7(5) . . ? 
C74 C73 C72 121.5(5) . . ? 
C68 C73 C72 118.7(5) . . ? 
C73 C74 C75 121.8(5) . . ? 
C73 C74 H74 119.1 . . ? 
C75 C74 H74 119.1 . . ? 
C74 C75 C76 121.7(5) . . ? 
C74 C75 C80 118.9(5) . . ? 
C76 C75 C80 119.4(5) . . ? 
C77 C76 C75 120.8(6) . . ? 
C77 C76 H76 119.6 . . ? 
C75 C76 H76 119.6 . . ? 
C76 C77 C78 119.9(6) . . ? 
C76 C77 H77 120.0 . . ? 
C78 C77 H77 120.0 . . ? 
C79 C78 C77 121.3(6) . . ? 
C79 C78 H78 119.3 . . ? 
C77 C78 H78 119.3 . . ? 
C78 C79 C80 122.2(6) . . ? 
C78 C79 H79 118.9 . . ? 
C80 C79 H79 118.9 . . ? 
C67 C80 C79 124.0(5) . . ? 
C67 C80 C75 119.7(5) . . ? 
C79 C80 C75 116.3(5) . . ? 
Cl2 C81 Cl1 110.0(3) . . ? 
Cl2 C81 Cl3 111.4(3) . . ? 
Cl1 C81 Cl3 110.7(3) . . ? 
Cl2 C81 H81 108.2 . . ? 
Cl1 C81 H81 108.2 . . ? 
Cl3 C81 H81 108.2 . . ? 
Cl6 C82 Cl4 109.7(4) . . ? 
Cl6 C82 Cl5 110.1(4) . . ? 
Cl4 C82 Cl5 111.4(4) . . ? 
Cl6 C82 H82 108.5 . . ? 
Cl4 C82 H82 108.5 . . ? 
Cl5 C82 H82 108.5 . . ? 
 
loop_ 
 _geom_torsion_atom_site_label_1 
 _geom_torsion_atom_site_label_2 
 _geom_torsion_atom_site_label_3 
 _geom_torsion_atom_site_label_4 
 _geom_torsion 
 _geom_torsion_site_symmetry_1 
 _geom_torsion_site_symmetry_2 
 _geom_torsion_site_symmetry_3 
 _geom_torsion_site_symmetry_4 
 _geom_torsion_publ_flag 
C46 N1 N2 N3 1.2(6) . . . . ? 
N1 N2 N3 C47 -1.0(6) . . . . ? 
N1 N2 N3 C48 -178.4(4) . . . . ? 
C64 N4 N5 N6 1.3(6) . . . . ? 
N4 N5 N6 C65 -0.7(6) . . . . ? 
N4 N5 N6 C66 -177.4(4) . . . . ? 
O1 C1 C2 C3 -178.2(4) . . . . ? 
C6 C1 C2 C3 1.6(7) . . . . ? 
O1 C1 C2 C28 4.7(7) . . . . ? 
C6 C1 C2 C28 -175.4(5) . . . . ? 
C1 C2 C3 C4 0.7(8) . . . . ? 
C28 C2 C3 C4 177.7(5) . . . . ? 
C2 C3 C4 C5 -1.8(7) . . . . ? 
C2 C3 C4 C29 -179.3(5) . . . . ? 
C3 C4 C5 C6 0.6(7) . . . . ? 
C29 C4 C5 C6 178.2(5) . . . . ? 
C4 C5 C6 C1 1.5(7) . . . . ? 
C4 C5 C6 C7 -172.7(4) . . . . ? 
O1 C1 C6 C5 177.2(4) . . . . ? 
C2 C1 C6 C5 -2.7(7) . . . . ? 
O1 C1 C6 C7 -8.5(7) . . . . ? 
C2 C1 C6 C7 171.6(4) . . . . ? 
C5 C6 C7 C8 102.5(5) . . . . ? 
C1 C6 C7 C8 -71.6(6) . . . . ? 
C6 C7 C8 C9 110.1(5) . . . . ? 
C6 C7 C8 C13 -64.9(6) . . . . ? 
C13 C8 C9 O2 178.1(4) . . . . ? 
C7 C8 C9 O2 3.0(7) . . . . ? 
C13 C8 C9 C10 0.9(7) . . . . ? 
C7 C8 C9 C10 -174.2(4) . . . . ? 
C45 O2 C9 C8 94.3(5) . . . . ? 
C45 O2 C9 C10 -88.5(5) . . . . ? 
C8 C9 C10 C11 -1.5(7) . . . . ? 
O2 C9 C10 C11 -178.6(4) . . . . ? 
C8 C9 C10 C14 177.9(5) . . . . ? 
O2 C9 C10 C14 0.7(7) . . . . ? 
C9 C10 C11 C12 1.1(8) . . . . ? 
C14 C10 C11 C12 -178.3(5) . . . . ? 
C10 C11 C12 C13 -0.2(8) . . . . ? 
C10 C11 C12 C33 -178.7(5) . . . . ? 
C9 C8 C13 C12 0.1(7) . . . . ? 
C7 C8 C13 C12 175.3(5) . . . . ? 
C11 C12 C13 C8 -0.4(8) . . . . ? 
C33 C12 C13 C8 178.2(5) . . . . ? 
C11 C10 C14 C15 73.1(7) . . . . ? 
C9 C10 C14 C15 -106.2(6) . . . . ? 
C10 C14 C15 C20 -107.6(6) . . . . ? 
C10 C14 C15 C16 71.1(6) . . . . ? 
C20 C15 C16 O3 -178.4(4) . . . . ? 
C14 C15 C16 O3 2.9(7) . . . . ? 
C20 C15 C16 C17 1.4(7) . . . . ? 
C14 C15 C16 C17 -177.3(4) . . . . ? 
O3 C16 C17 C18 177.1(4) . . . . ? 
C15 C16 C17 C18 -2.7(7) . . . . ? 
O3 C16 C17 C21 -11.9(7) . . . . ? 
C15 C16 C17 C21 168.3(4) . . . . ? 
C16 C17 C18 C19 1.8(7) . . . . ? 
C21 C17 C18 C19 -168.8(5) . . . . ? 
C17 C18 C19 C20 0.3(7) . . . . ? 
C17 C18 C19 C37 179.0(5) . . . . ? 
C16 C15 C20 C19 0.8(7) . . . . ? 
C14 C15 C20 C19 179.6(5) . . . . ? 
C18 C19 C20 C15 -1.6(7) . . . . ? 
C37 C19 C20 C15 179.7(5) . . . . ? 
C18 C17 C21 C22 101.9(5) . . . . ? 
C16 C17 C21 C22 -68.8(6) . . . . ? 
C17 C21 C22 C27 -58.0(6) . . . . ? 
C17 C21 C22 C23 116.8(5) . . . . ? 
C63 O4 C23 C22 102.2(5) . . . . ? 
C63 O4 C23 C24 -83.4(5) . . . . ? 
C27 C22 C23 O4 175.1(4) . . . . ? 
C21 C22 C23 O4 0.1(7) . . . . ? 
C27 C22 C23 C24 0.8(7) . . . . ? 
C21 C22 C23 C24 -174.2(5) . . . . ? 
O4 C23 C24 C25 -175.3(4) . . . . ? 
C22 C23 C24 C25 -1.1(7) . . . . ? 
O4 C23 C24 C28 1.8(7) . . . . ? 
C22 C23 C24 C28 176.0(4) . . . . ? 
C23 C24 C25 C26 1.5(8) . . . . ? 
C28 C24 C25 C26 -175.6(5) . . . . ? 
C24 C25 C26 C27 -1.7(8) . . . . ? 
C24 C25 C26 C41 176.3(5) . . . . ? 
C23 C22 C27 C26 -1.0(7) . . . . ? 
C21 C22 C27 C26 174.0(5) . . . . ? 
C25 C26 C27 C22 1.4(8) . . . . ? 
C41 C26 C27 C22 -176.7(5) . . . . ? 
C3 C2 C28 C24 -108.7(5) . . . . ? 
C1 C2 C28 C24 68.3(6) . . . . ? 
C25 C24 C28 C2 65.2(6) . . . . ? 
C23 C24 C28 C2 -111.8(5) . . . . ? 
C3 C4 C29 C32 -14.1(9) . . . . ? 
C5 C4 C29 C32 168.5(7) . . . . ? 
C3 C4 C29 C31 -134.2(6) . . . . ? 
C5 C4 C29 C31 48.4(7) . . . . ? 
C3 C4 C29 C30 106.4(7) . . . . ? 
C5 C4 C29 C30 -71.0(7) . . . . ? 
C11 C12 C33 C36 -132.9(6) . . . . ? 
C13 C12 C33 C36 48.6(7) . . . . ? 
C11 C12 C33 C34 -13.2(8) . . . . ? 
C13 C12 C33 C34 168.4(6) . . . . ? 
C11 C12 C33 C35 106.6(7) . . . . ? 
C13 C12 C33 C35 -71.8(8) . . . . ? 
C18 C19 C37 C40 175.2(5) . . . . ? 
C20 C19 C37 C40 -6.2(8) . . . . ? 
C18 C19 C37 C38 -62.9(7) . . . . ? 
C20 C19 C37 C38 115.7(6) . . . . ? 
C18 C19 C37 C39 56.6(7) . . . . ? 
C20 C19 C37 C39 -124.7(6) . . . . ? 
C25 C26 C41 C44 -3.1(9) . . . . ? 
C27 C26 C41 C44 174.9(6) . . . . ? 
C25 C26 C41 C42 119.5(7) . . . . ? 
C27 C26 C41 C42 -62.5(8) . . . . ? 
C25 C26 C41 C43 -122.9(7) . . . . ? 
C27 C26 C41 C43 55.1(8) . . . . ? 
C9 O2 C45 C46 153.3(4) . . . . ? 
N2 N1 C46 C47 -1.0(6) . . . . ? 
N2 N1 C46 C45 179.2(5) . . . . ? 
O2 C45 C46 N1 176.3(4) . . . . ? 
O2 C45 C46 C47 -3.6(8) . . . . ? 
N2 N3 C47 C46 0.4(6) . . . . ? 
C48 N3 C47 C46 177.5(5) . . . . ? 
N1 C46 C47 N3 0.3(6) . . . . ? 
C45 C46 C47 N3 -179.8(5) . . . . ? 
C47 N3 C48 C49 52.3(7) . . . . ? 
N2 N3 C48 C49 -130.8(5) . . . . ? 
N3 C48 C49 C50 -98.6(6) . . . . ? 
N3 C48 C49 C62 81.5(6) . . . . ? 
C62 C49 C50 C55 0.5(8) . . . . ? 
C48 C49 C50 C55 -179.5(5) . . . . ? 
C62 C49 C50 C51 -179.4(5) . . . . ? 
C48 C49 C50 C51 0.6(8) . . . . ? 
C49 C50 C51 C52 -179.3(5) . . . . ? 
C55 C50 C51 C52 0.8(8) . . . . ? 
C50 C51 C52 C53 -0.5(9) . . . . ? 
C51 C52 C53 C54 -0.5(9) . . . . ? 
C52 C53 C54 C55 1.2(9) . . . . ? 
C53 C54 C55 C56 179.3(6) . . . . ? 
C53 C54 C55 C50 -0.8(8) . . . . ? 
C49 C50 C55 C56 -0.2(8) . . . . ? 
C51 C50 C55 C56 179.7(5) . . . . ? 
C49 C50 C55 C54 179.9(5) . . . . ? 
C51 C50 C55 C54 -0.1(7) . . . . ? 
C54 C55 C56 C57 179.8(5) . . . . ? 
C50 C55 C56 C57 0.0(8) . . . . ? 
C55 C56 C57 C62 0.1(8) . . . . ? 
C55 C56 C57 C58 -179.0(5) . . . . ? 
C62 C57 C58 C59 0.1(9) . . . . ? 
C56 C57 C58 C59 179.2(5) . . . . ? 
C57 C58 C59 C60 -0.5(9) . . . . ? 
C58 C59 C60 C61 0.5(10) . . . . ? 
C59 C60 C61 C62 0.0(9) . . . . ? 
C58 C57 C62 C49 179.3(5) . . . . ? 
C56 C57 C62 C49 0.2(8) . . . . ? 
C58 C57 C62 C61 0.3(8) . . . . ? 
C56 C57 C62 C61 -178.8(5) . . . . ? 
C50 C49 C62 C57 -0.5(8) . . . . ? 
C48 C49 C62 C57 179.5(5) . . . . ? 
C50 C49 C62 C61 178.4(5) . . . . ? 
C48 C49 C62 C61 -1.6(8) . . . . ? 
C60 C61 C62 C57 -0.3(8) . . . . ? 
C60 C61 C62 C49 -179.3(5) . . . . ? 
C23 O4 C63 C64 147.0(4) . . . . ? 
N5 N4 C64 C65 -1.5(6) . . . . ? 
N5 N4 C64 C63 175.6(5) . . . . ? 
O4 C63 C64 N4 173.8(4) . . . . ? 
O4 C63 C64 C65 -9.6(7) . . . . ? 
N5 N6 C65 C64 -0.2(6) . . . . ? 
C66 N6 C65 C64 176.1(5) . . . . ? 
N4 C64 C65 N6 1.1(6) . . . . ? 
C63 C64 C65 N6 -175.9(5) . . . . ? 
C65 N6 C66 C67 -25.0(8) . . . . ? 
N5 N6 C66 C67 151.1(5) . . . . ? 
N6 C66 C67 C80 -72.6(6) . . . . ? 
N6 C66 C67 C68 104.1(6) . . . . ? 
C80 C67 C68 C73 -3.2(7) . . . . ? 
C66 C67 C68 C73 -179.9(5) . . . . ? 
C80 C67 C68 C69 176.1(5) . . . . ? 
C66 C67 C68 C69 -0.5(8) . . . . ? 
C67 C68 C69 C70 179.7(5) . . . . ? 
C73 C68 C69 C70 -0.9(8) . . . . ? 
C68 C69 C70 C71 0.6(9) . . . . ? 
C69 C70 C71 C72 -0.2(9) . . . . ? 
C70 C71 C72 C73 0.2(8) . . . . ? 
C67 C68 C73 C74 2.4(7) . . . . ? 
C69 C68 C73 C74 -177.0(5) . . . . ? 
C67 C68 C73 C72 -179.7(5) . . . . ? 
C69 C68 C73 C72 0.9(7) . . . . ? 
C71 C72 C73 C74 177.4(5) . . . . ? 
C71 C72 C73 C68 -0.6(8) . . . . ? 
C68 C73 C74 C75 -0.5(8) . . . . ? 
C72 C73 C74 C75 -178.4(5) . . . . ? 
C73 C74 C75 C76 177.4(5) . . . . ? 
C73 C74 C75 C80 -0.5(8) . . . . ? 
C74 C75 C76 C77 -176.6(6) . . . . ? 
C80 C75 C76 C77 1.3(8) . . . . ? 
C75 C76 C77 C78 -2.8(9) . . . . ? 
C76 C77 C78 C79 2.9(10) . . . . ? 
C77 C78 C79 C80 -1.4(10) . . . . ? 
C68 C67 C80 C79 -176.1(5) . . . . ? 
C66 C67 C80 C79 0.6(8) . . . . ? 
C68 C67 C80 C75 2.2(7) . . . . ? 
C66 C67 C80 C75 178.9(5) . . . . ? 
C78 C79 C80 C67 178.3(6) . . . . ? 
C78 C79 C80 C75 -0.1(8) . . . . ? 
C74 C75 C80 C67 -0.3(7) . . . . ? 
C76 C75 C80 C67 -178.3(5) . . . . ? 
C74 C75 C80 C79 178.1(5) . . . . ? 
C76 C75 C80 C79 0.2(7) . . . . ? 
 
_diffrn_measured_fraction_theta_max    0.979 
_diffrn_reflns_theta_full              25.00 
_diffrn_measured_fraction_theta_full   0.979 
_refine_diff_density_max    0.665 
_refine_diff_density_min   -0.524 
_refine_diff_density_rms    0.085 
